# Supplementary material
Source: HighWire-hosted journal article supplement (https://bmjopen.bmj.com/content/7/4/e015354)
Supplement: inline-supplementary-material-1 [file inline-supplementary-material-1.pdf]

**Supplementary table 1. Details of electronic bibliographic database search strategies**

| Database                                            | Search strategies                                                                                                                                                                         |
|-----------------------------------------------------|-------------------------------------------------------------------------------------------------------------------------------------------------------------------------------------------|
| Pubmed                                              | ((("acne vulgaris"[MeSH Terms] AND ("prevalence"[MeSH Terms] OR "incidence"[MeSH Terms])) AND ("China"[MeSH Terms] OR "Chinese"[MeSH Terms]))                                             |
| Embase                                              | Title or Abstract acne AND Title or Abstract ( china or chinese ) AND Title or Abstract ( prevalence or incidence or epidemiology )                                                       |
| Web of science                                      | Title or Abstract:(acne) AND Title or Abstract: (prevalence or incidence or epidemiology) AND Title or Abstract: (china or Chinese)                                                       |
| China National Knowledge Infrastructure Periodicals | Keywords: acne AND Keywords: prevalence or incidence or epidemiology                                                                                                                      |
| The VIP Database for Chinese Technical              | (1) Title or Keywords: acne; Property: dim AND Title or Keywords: prevalence; Property: dim<br>(2) Title or Keywords: acne; Property: dim AND Title or Keywords: incidence; Property: dim |
| The Wan Fang Database for Chinese Periodicals       | (1) Title or Keywords: acne; Property: dim AND Title or Keywords: prevalence; Property: dim<br>(2) Title or Keywords: acne; Property: dim AND Title or Keywords: incidence; Property: dim |
